# Supplementary material for: Comparison of two different coagulation algorithms on the use of allogenic blood products and coagulation factors in severely injured trauma patients: a retrospective, multicentre, observational study
Source: Springer Nature journal article supplement (doi:10.1186/s13049-017-0463-0), 2018-01-08
Supplement: MOESM1 [file 15350112]

# Goal-directed coagulation and transfusion algorithm of the Institute of Anesthesiology, Kantonsspital Lucerne

## Basic conditions:

Volume: Fluid therapy with balanced crystalloid solution (balanced Gelatin solution may be considered)

Always: Temperature  $\geq 35^{\circ}\text{C}$  + pH  $\geq 7.2$  + Ionized Calcium  $\geq 1.15\text{mmol/L}$  + Hematocrit  $\geq 0.21$

Patient history: something known about medication or coagulation disorders? Consider Desmopressin  $0.3\mu\text{g/kg}$  in case of platelet-inhibitors intake. Antagonize heparin with protamine 1:1.

## Diffuse microvascular bleeding (> 50% Bloodvolume):

Extem spindle-shaped + Aptem normal: Hyperfibrinolysis  $\rightarrow$  2g Tranexamic acid (15-30mg/kg)

Fibtem-MCF  $\leq 7\text{mm}$ : 1-2g Fibrinogen (max. 3x2g, after that factor XIII 15U/kg); Target value: MCF  $\geq 7\text{mm}$  (fibrinogen  $\geq 1.5\text{-}2.0\text{ g/L}$ )

## Laboratory:

Hematocrit, platelet count, prothrombin time, INR, activated partial thromboplastin time, fibrinogen concentration, Rotem (Extem, Intem, Fibtem, Aptem), factor XIII, Anti-Xa, thrombin time

## Ongoing bleeding (5-10 Liters)

Extem/Intem: CT prolonged (Extem  $>80\text{s}$ , Intem  $>240\text{s}$ ): Prothrombin complex concentrate 500-2'000U (according to bodyweight and INR)

Extem/Intem: CT normal (Extem  $<80\text{s}$ , Intem  $<240\text{s}$ ) + MCF  $<40\text{mm}$ : Factor XIII 1250U (15U/kg) if Fibtem-MCF stays  $\leq 7\text{mm}$  despite fibrinogen administration. Target value factor XIII  $\geq 60\%$  (if  $\leq 40\%$   $\rightarrow$  20U/kg / if  $\leq 50\%$   $\rightarrow$  15U/kg). Further administration of fibrinogen, as long as Fibtem-MCF  $\leq 7\text{mm}$

Extem/Intem: MCF  $< 40\text{mm}$  although Fibtem-MCF  $>10\text{mm}$  + Tc  $< 50'000/\text{mm}^3$ : 1 Platelet concentrate

## Other potential measures:

Arterial ligation, cloths compression, aorta clamping, embolization, hysterectomy

## Further ongoing bleeding (>10 Liters)

FFP: 15ml/kg ( $\sim 4\text{U}$ )  $\rightarrow$  for factors XI and V

If prognosis isn't infaust and temperature, pH, platelet count and fibrinogen target-values are achieved: rFVIIa:  $90\mu\text{g/kg}$  ( $\approx 7.2\text{mg}$ ) – once repeatable after 30min.

If further ongoing diffuse bleeding, contemplate von Willebrand factor concentrate 2000U (20-30U/kg factor VIII)

**Trauma patient (age  $<50\text{yrs}$  + not infaust prognosis + Temperature  $>35^{\circ}\text{C}$  + diffuse bleeding) or uterine atony (Extem-MCF  $<25\text{mm}$  + Fibtem-MCF  $<4\text{mm}$  + Extem-CT  $>90\text{s}$  or at the extreme, possible to give without laboratory):**

2g Tranexamic acid + 4g Fibrinogen + 1'000U Prothrombin complex concentrate + 4 erythrocytes concentrates (blood group 0 negative) + 1250U factor XIII
